# Supplementary material for: Extracellular Vesicles Released by Genetically Modified Macrophages Activate Autophagy and Produce Potent Neuroprotection in Mouse Model of Lysosomal Storage Disorder, Batten Disease
Source: MDPI journal article supplement (doi:10.3390/cells12111497), 2023-05-29
Supplement: s1 [file s1]

# Supporting Information

## **Macrophage Derived Extracellular Vesicles Loaded with a Therapeutic Enzyme Activate Autophagy and Produce Potent Neuroprotection in a Mouse Model of Lysosomal Storage Disorder, Batten Disease**

Nazira El-Hage<sup>1</sup>, Matthew J. Haney<sup>2,3</sup>, Yuling Zhao<sup>2,3</sup>, Myosotys Rodriguez<sup>1</sup>, Mori Liu<sup>3</sup>, Carson J. Swain<sup>3</sup>, and Elena V. Batrakova<sup>2,3,\*</sup>

<sup>1</sup> Florida International University [myrodrig@fiu.edu](mailto:myrodrig@fiu.edu) (M.R.); [nelhage@fiu.edu](mailto:nelhage@fiu.edu) (N. E-H.)

<sup>2</sup> Center for Nanotechnology in Drug Delivery; University of North Carolina at Chapel Hill, Chapel Hill, NC 27599, USA; [yulingz@email.unc.edu](mailto:yulingz@email.unc.edu) (Y.Z.); [mjhaney@email.unc.edu](mailto:mjhaney@email.unc.edu) (M.J.H.); [batrakov@ad.unc.edu](mailto:batrakov@ad.unc.edu) (E.V.B.)

<sup>3</sup> Eshelman School of Pharmacy, University of North Carolina at Chapel Hill, Chapel Hill, North Carolina, USA; [jfallon@email.unc.edu](mailto:jfallon@email.unc.edu) (J.K.F.); [camiarzt@live.unc.edu](mailto:camiarzt@live.unc.edu) (C.J.A.); [pcs@email.unc.edu](mailto:pcs@email.unc.edu) (P.C.S.); [matthew.loop@unc.edu](mailto:matthew.loop@unc.edu) (M.S.L.)

\*Correspondence should be addressed to E.V.B. ([batrakov@ad.unc.edu](mailto:batrakov@ad.unc.edu))

UNC Eshelman School of Pharmacy, University of North Carolina at Chapel Hill, Chapel Hill, NC 27599-7362, Phone: 919-537-3712, Email: [batrakov@ad.unc.edu](mailto:batrakov@ad.unc.edu)

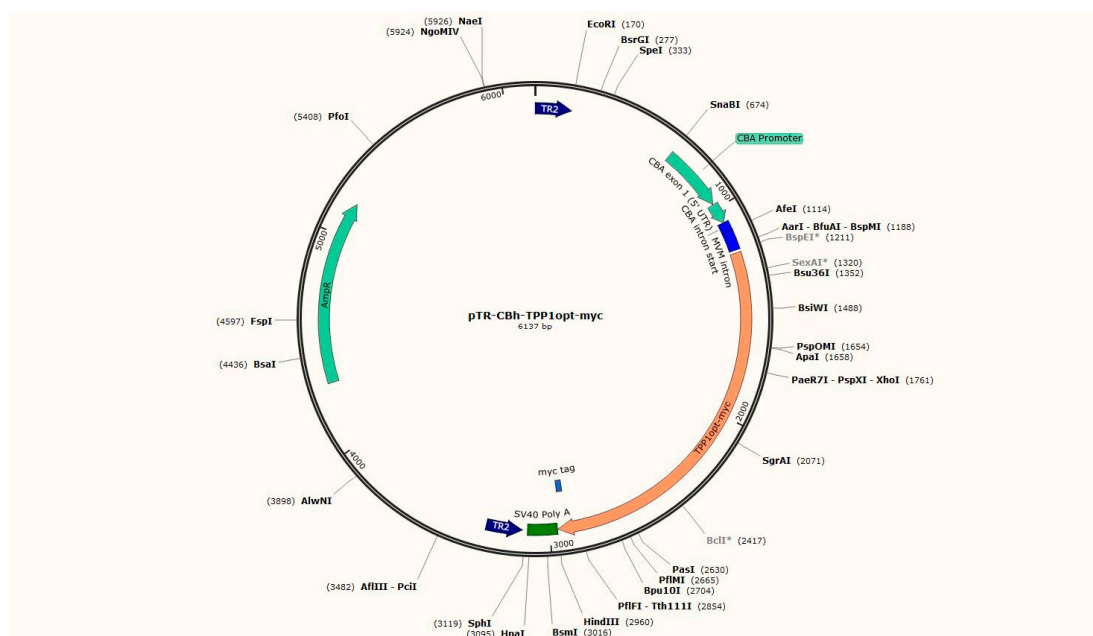

**Supplementary Figure S1. Plasmid map of TPP1-encoding *pDNA* with Myc tag.**

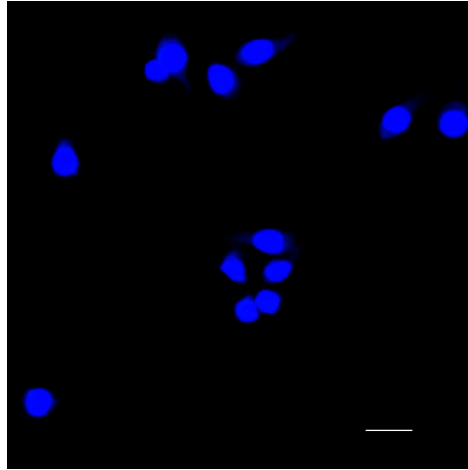

**Supplementary Figure S2. Confocal image of control macrophages.** The cells were transfected by electroporation in the absence of TPP1-*p*DNA with Myc tag and seeded onto slide. 24 h later, the cells were treated with FITC anti-Myc tag antibody (ab1263) and imaged by confocal microscopy. Nuclei were stained with DAPI (blue). No fluorescence indicating absence of significant background was recorded. Scale bar = 20  $\mu$ m.

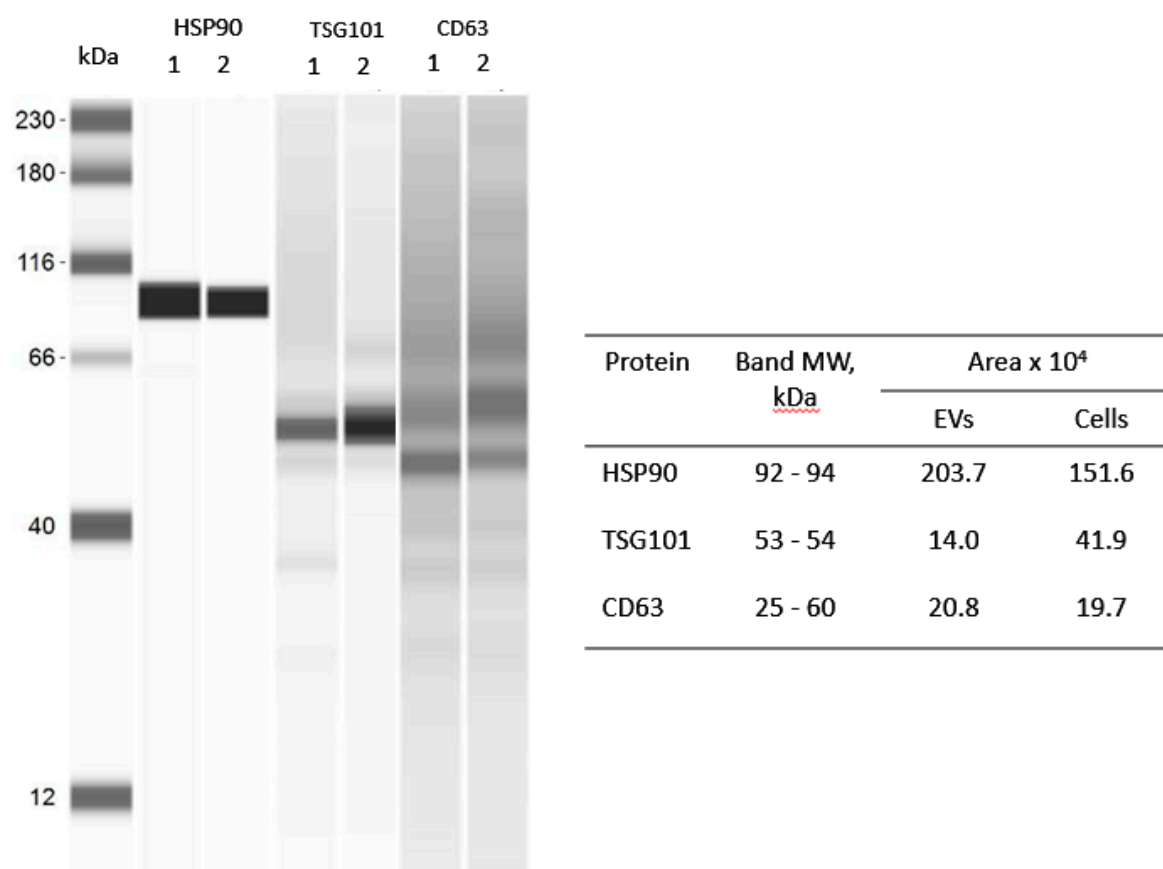

**Supplementary Figure S3. Characterization of EV-TPP1 by Western Blot analysis.** Expression levels of EV-specific proteins in EVs (1) and parent cells (2) were assessed by Wes. In most cases EVs show higher levels of examined proteins compared to cells.

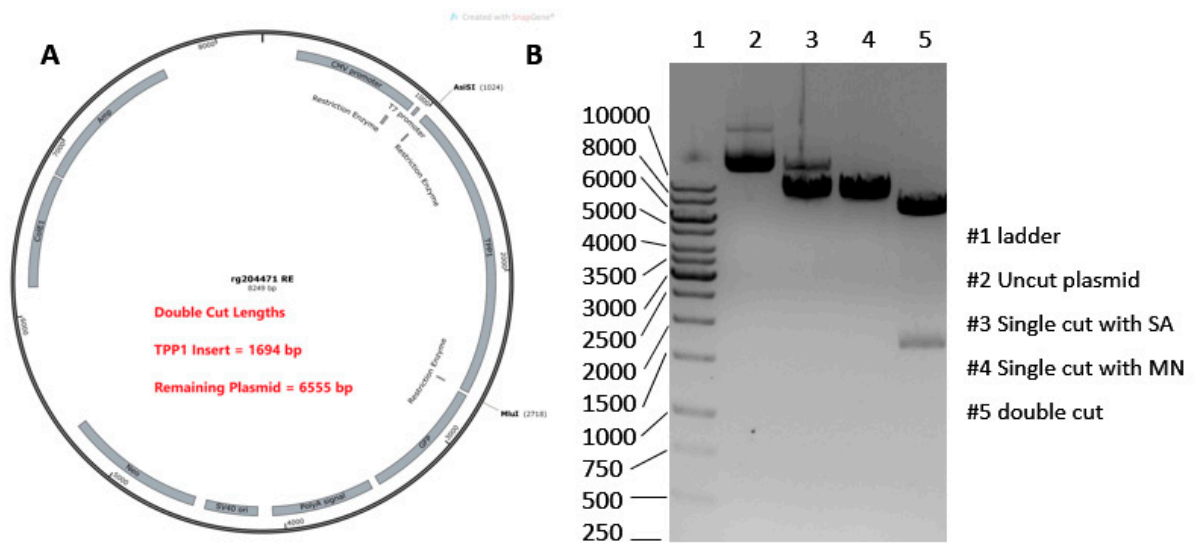

**Supplementary Figure S4. TPP1-encoding *pDNA* production, and verification.** A: plasmid map for TPP1 production, B: Giga Prep verification of TPP1-*pDNA*.

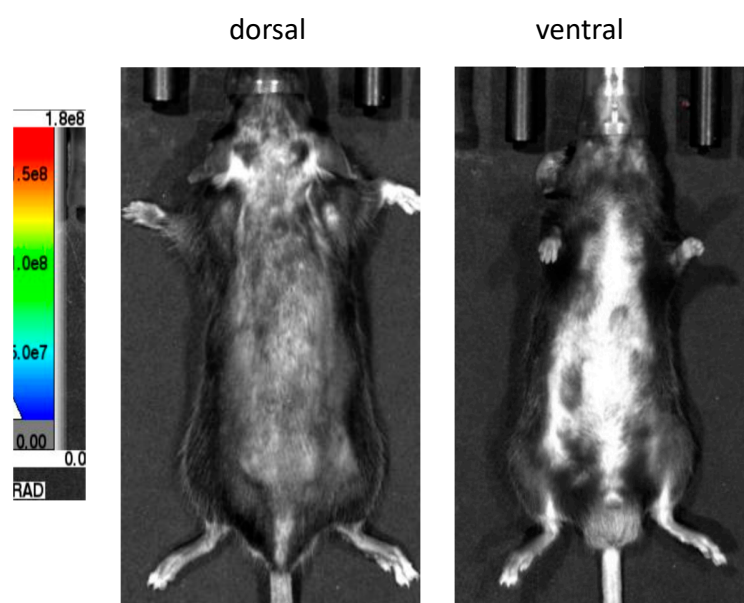

**Supplementary Figure S5. Images of untreated control mice by IVIS.** Representative dorsal and ventral images of control mice injected with saline did not show any fluorescence.

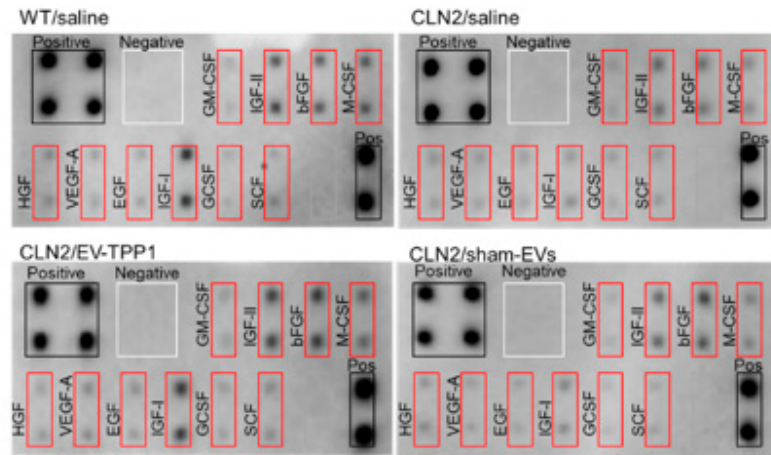

**Supplementary Figure S6. Effect of EV-TPP1 treatment on expression of different growth factors in mouse brain.** Imaging of the membranes showing both positive and negative data.

**Supplementary Table S1. Primary antibodies used for Simple Western Blot**

| <b>Antibody</b> | <b>Manufacturer</b> | <b>ID</b>  | <b>Stock<br/>concentration<br/>mg/ml</b> | <b>Dilution<br/>factor</b> | <b>Protein<br/>concentration<br/>mg/ml</b> |
|-----------------|---------------------|------------|------------------------------------------|----------------------------|--------------------------------------------|
| CD63            | Novus               | NBP2-67425 | 1.000                                    | 100                        | 40                                         |
| HSP90 beta      | Novus               | NBP2-67395 | 1.000                                    | 50                         | 200                                        |
| TSG101          | Novus               | NBP2-67884 | 1.000                                    | 500                        | 40                                         |
| β Actin         | Abcam               | ab213262   | 0.500                                    | 50                         | 200                                        |



**Supplementary Table S2. %ID/g in the main organs of animals injected with <sup>64</sup>Cu-EVs**

| Animal    | Organ      | %ID/g |       |       |
|-----------|------------|-------|-------|-------|
|           |            | 1h    | 24h   | 48h   |
| Animal #1 | Spine      | 53.33 | 22.39 | 18.77 |
|           | Cerebrum   | 3.48  | 2.84  | 2.58  |
|           | Cerebellum | 17.29 | 14.82 | 8.84  |
|           | Liver      | 8.68  | 8.92  | 9.25  |
|           | Kidney     | 4.27  | 4.21  | 6.18  |
| Animal #2 | Spine      | 25.72 | 15.66 | 7.46  |
|           | Cerebrum   | 1.87  | 1.3   | 1.2   |
|           | Cerebellum | 10.64 | 7.48  | 6.48  |
|           | Liver      | 30.91 | 26.45 | 15.34 |
|           | Kidney     | 6.72  | 7.14  | 5.38  |
| Animal #3 | Spine      | 23.36 | 18.29 | 11.07 |
|           | Cerebrum   | 2.10  | 1.83  | 1.55  |
|           | Cerebellum | 9.47  | 6.29  | 3.37  |
|           | Liver      | 23.26 | 15.16 | 15.43 |
|           | Kidney     | 4.56  | 5.47  | 4.94  |

**Supplementary Table S3. Quantification of the brain slides of CLN2 mice and WT control animals treated with different EV-based formulations for the presence of subunit c of mitochondrial ATP synthase (SCMAS)\***

| Area/treatment | WT/saline (FIU) | CLN2/saline (FIU) | CLN2/EV-TTP1 (FIU)  | CLN2/sham EVs (FIU) |
|----------------|-----------------|-------------------|---------------------|---------------------|
| Cerebellum     | 193.0 ± 6.9     | 967.7 ± 32.7      | 147.5 ± 4.8 (***)   | 373.3 ± 23.0        |
| Frontal lobe   | 304.2 ± 40.3    | 1004.2 ± 458.2    | 145.5 ± 7.6 (**)    | 585.2 ± 37.5        |
| Motor cortex   | 281.1 ± 34.5    | 1262.1 ± 263.7    | 159.9 ± 6.4 (****)  | 467.2 ± 36.0        |
| Pons           | 165.3 ± 18.7    | 661.7 ± 45.5      | 141.4 ± 6.7 (*****) | 463.2 ± 71.5        |

\*Data were analyzed using one or two-way ANOVA analysis followed by Tukey's multiple comparisons test. Values are means ± SEM. *N* = 8, \*\*\*\**P* < 0.00001; \*\*\**P* < 0.0001; \*\**P* < 0.005; \**P* < 0.05, compared to CLN2/saline.
